# Supplementary material for: Evaluation and Selection of Candidate Reference Genes for Normalization of Quantitative RT-PCR in Withania somnifera (L.) Dunal
Source: PubMed Central journal article supplement (PMC4359125; doi:10.1371/journal.pone.0118860), 2015-03-13
Supplement: pone.0118860.s004.pdf [file pone.0118860.s004.pdf]

| <b>Gene Symble</b> | <b>Primer sequences (5' to 3')<br/>FP/RP</b> | <b>Gene description</b>                         | <b>Accession Number</b> | <b>Amplicon size (bp)</b> | <b>Tm (°C)</b> |
|--------------------|----------------------------------------------|-------------------------------------------------|-------------------------|---------------------------|----------------|
| CAS                | AACGCTTTGTCGGTCCTATC                         | cycloartenol synthase                           | HM037907.1              | 105                       | 62             |
|                    | CACACTCATTGCGAGCTTTATC                       |                                                 |                         |                           |                |
| HMGR               | ATGATTTCCGGTGACGTAGTG                        | 3-hydroxy-3-methylglutaryl coenzyme A reductase | HQ293119.1              | 98                        | 62             |
|                    | GCAATAGCAGAGCCAGTAAGA                        |                                                 |                         |                           |                |
| P450               | ATGGTGAACCGACCGATAAC                         | cytochrome P450 reductase                       | GU808569.1              | 106                       | 62             |
|                    | CCAAGCCCAAATACTCCATACT                       |                                                 |                         |                           |                |
